# Supplementary material for: Conserved Genes Act as Modifiers of Invertebrate SMN Loss of Function Defects
Source: PLoS Genet. 2010 Oct 28;6(10):e1001172. doi: 10.1371/journal.pgen.1001172 (PMC2965752; doi:10.1371/journal.pgen.1001172)
Supplement: Table S1 — Summary of C. elegans growth assays. (0.09 MB DOC) [file pgen.1001172.s001.doc]

| **Table S1. Summary of *C. elegans* growth assays** | | | | |  |  |  |
| --- | --- | --- | --- | --- | --- | --- | --- |
|  |  |  |  |  |  |  |  |
| *Dm* gene | *Ce* gene | *Cesmn-1(lf)* homozygous | | | *+/Cesmn-1(lf)* heterozygous | | |
|  | RNAi target | Mean | SEM | p | Mean | SEM | p |
| - | *none* | 18.0 | 2.2 | - | 46.1 | 1.0 | - |
| SMN | *smn-1* | 5.9 | 4.4 | <0.001 | 31.2 | 1.1 | 0.017 |
| Fim | *plst-1* | 15.2 | 3.2 | 0.390 | 55.2 | 2.5 | 0.023 |
| actinin | *atn-1* | 22.5 | 4.1 | 0.029 | 42.8 | 1.0 | 0.763 |
| Usp | *nhr-25* | 16.8 | 4.9 | 0.815 | 37.5 | 3.6 | 0.159 |
| SK | *kcnl-2* | 12.2 | 1.1 | 0.011 | 41.5 | 1.1 | 0.280 |
| CG32796 | *sax-3* | 14.9 | 5.1 | 0.185 | 42.2 | 2.8 | 0.763 |
| Trol | *unc-52* | 16.8 | 3.5 | 0.815 | 46.6 | 2.8 | 0.651 |
| Sprint | *C48G7.2* | 15.9 | 5.5 | 0.483 | 48.0 | 4.1 | 0.547 |
| CG6414 | *-* | - | - | - | - | - | - |
| CG33172 | *cash-1* | 26.1 | 5.4 | 0.876 | 64.1 | 10.9 | 0.021 |
| CG1835 | *-* | - | - | - | - | - | - |
| CG18375 | *ape-1* | 10.7 | 8.6 | 0.024 | 49.5 | 2.0 | 0.841 |
| CG34379 | *-* | - | - | - | - | - | - |
| CG8589 | *-* | - | - | - | - | - | - |
| CG11450 | *hlh-4* | - | - | - | - | - | - |
| Wit | *sma-6* | 15.1 | 6.2 | 0.213 | 51.5 | 2.3 | 0.393 |
| Wit | *daf-4* | 19.0 | 8.0 | 0.938 | 46.9 | 5.3 | 0.920 |
| CG5361 | *-* | - | - | - | - | - | - |
| Fmr1 | *ZK418.9* | 18.1 | 3.5 | 0.756 | 41.8 | 2.3 | 0.340 |
| Eip75B | *nhr-85* | 7.9 | 5.2 | 0.002 | 44.2 | 1.3 | 0.832 |
| CG1927 | *-* | - | - | - | - | - | - |
| Btl | *egl-15* | 8.9 | 5.4 | 0.004 | 44.5 | 1.4 | 0.655 |
| Raptor | *daf-15* | 15.9 | 3.2 | 0.679 | 45.6 | 3.6 | 0.920 |
| Mipp2 | *pho-5* | 17.2 | 1.9 | 0.938 | 53.6 | 3.0 | 0.079 |
| Nep1 | *nep-2* | 15.5 | 5.9 | 0.586 | 35.6 | 3.1 | 0.159 |
| Moesin | *erm-1* | 14.1 | 1.9 | 0.392 | 45.1 | 4.0 | 0.725 |
| Nek2 | *nekl-3* | 13.2 | 2.8 | 0.031 | 43.2 | 1.5 | 0.709 |
| p115 | *uso-1* | 6.9 | 4.4 | 0.002 | 43.5 | 0.5 | 0.766 |
| ctp | *dlc-1* | 14.8 | 7.7 | 0.131 | 66.4 | 2.8 | 0.039 |
| Rho-4 | *rom-1* | 14.5 | 3.8 | 0.161 | 51.0 | 2.6 | 0.191 |
| CG1561 | *-* | - | - | - | - | - | - |
| CG3136 | *atf-6* | 10.5 | 7.4 | 0.010 | 40.0 | 0.4 | 0.421 |
| CG8920 | *C56G2.1* | 15.8 | 1.7 | 0.312 | 43.6 | 1.1 | 0.801 |
| CG13868 | *-* | - | - | - | - | - | - |
| CG12214 | *C52B9.3* | 16.6 | 2.6 | 0.697 | 44.5 | 4.1 | 0.920 |
| CG13775 | *C53D6.3* | 14.3 | 5.6 | 0.120 | 42.5 | 0.2 | 0.763 |
| CG10561 | *C24C6.6* | 21.2 | 1.8 | 0.312 | 49.5 | 1.3 | 0.248 |
|  |  |  |  |  |  |  |  |
| *Dm* gene | *Ce* gene | *Cesmn-1(lf)* homozygous | | | *+/Cesmn-1(lf)* heterozygous | | |
|  | RNAi target | Mean | SEM | p | Mean | SEM | p |
| - | *none* | 24.0 | 3.5 | - | 42.2 | 2.9 | - |
| CG4325 | *B0432.13* | 25.3 | 1.8 | 0.629 | 37.8 | 3.1 | 0.393 |
| CG17323 | *ugt-49* | 10.7 | 3.6 | <0.001 | 19.5 | 9.4 | 0.007 |
| CG17322 | *-* | - | - | - | - | - | - |
| CG17324 | *-* | - | - | - | - | - | - |
| CG11200 | *dhs-22* | 22.5 | 2.1 | 1.000 | 39.5 | 7.2 | 1.000 |

Table S1 is divided by horizontal lines into three sections corresponding to potential *Cesmn-1(lf)* modifier genes originally identified in humans and *Drosophila* (1 in *Hs* and40 in *Dm*). The *Drosophila* gene and *C. elegans* ortholog targeted by RNAi are listed in the first two columns of the table. The 3rd and 4th columns give the average size and standard error of the mean (S.E.M.) for *Cesmn-1(lf)* homozygous animals. The significance *versus* empty vector RNAi was determined for each gene using the two-tailed Mann-Whitney *U* test or Chi-squared test according to sample-specific parameters and is reported in column 5. Columns 6 through 8 report the results of the same analysis for *+/Cesmn-1(lf)* heterozygous animals. The *hlh-4(RNAi)* clone in the feeding library was incorrect; see Materials and Methods for details. Significant p-values (p<0.05) are shaded. The bottom panel of Table S1 reports data from a separate experiment conducted after the COPAS Biosorter was re-calibrated, accounting for the small discrepancies between controls.
